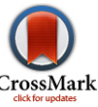

# A Protein Data Bank Survey Reveals Shortening of Intermolecular Hydrogen Bonds in Ligand-Protein Complexes When a Halogenated Ligand Is an H-Bond Donor

Jarosław Poznański<sup>1\*</sup>, Anna Poznańska<sup>2</sup>, David Shugar<sup>3\*</sup>

**1** Biophysics Department, Institute of Biochemistry and Biophysics PAS, Warszawa, Poland, **2** Centre for Monitoring and Analyses of Population Health Status, National Institute of Public Health - National Institute of Hygiene, Warszawa, Poland, **3** Institute of Biochemistry and Biophysics PAS, Warszawa, Poland

## Abstract

Halogen bonding in ligand-protein complexes is currently widely exploited, e.g. in drug design or supramolecular chemistry. But little attention has been directed to other effects that may result from replacement of a hydrogen by a strongly electronegative halogen. Analysis of almost 30000 hydrogen bonds between protein and ligand demonstrates that the length of a hydrogen bond depends on the type of donor-acceptor pair. Interestingly, lengths of hydrogen bonds between a protein and a halogenated ligand are visibly shorter than those estimated for the same family of proteins in complexes with non-halogenated ligands. Taking into account the effect of halogenation on hydrogen bonding is thus important when evaluating structural and/or energetic parameters of ligand-protein complexes. All these observations are consistent with the concept that halogenation increases the acidity of the proximal amino/imino/hydroxyl groups and thus makes them better, i.e. stronger, H-bond donors.

**Citation:** Poznański J, Poznańska A, Shugar D (2014) A Protein Data Bank Survey Reveals Shortening of Intermolecular Hydrogen Bonds in Ligand-Protein Complexes When a Halogenated Ligand Is an H-Bond Donor. PLoS ONE 9(6): e99984. doi:10.1371/journal.pone.0099984

**Editor:** Alexandre G. de Brevern, UMR-5665, INSERM, Université Paris Diderot, INTS, France

**Received:** October 26, 2013; **Accepted:** May 21, 2014; **Published:** June 16, 2014

**Copyright:** © 2014 Poznański et al. This is an open-access article distributed under the terms of the Creative Commons Attribution License, which permits unrestricted use, distribution, and reproduction in any medium, provided the original author and source are credited.

**Funding:** This work was supported by National Science Centre, Poland (<http://ncn.gov.pl/>); Grant number 2012/07/B/ST4/01334. The funder had no role in study design, data collection and analysis, decision to publish, or preparation of the manuscript.

**Competing Interests:** The authors have declared that no competing interests exist.

\* Email: jarek@ibb.waw.pl (JP); gwalesshugar@gmail.com (DS)

## Introduction

Specific non-covalent interactions of low-mass ligands with proteins drive properties of the enzymatic machinery in a living cell. According to (induced) key-lock theory (see [1] for review) a low-mass ligand should fit to a dedicated binding site that is accessible on the protein surface. This steric compatibility, known as van der Waals interactions, dominates ligand-protein selectivity, simply excluding the majority of putative ligands and favoring those that fit to the protein binding site. Other types of interactions modulate the stability of ligand-protein complexes. The strongest ones are electrostatic interactions between charged groups (known as salt-bridges, formally zero momentum in multipole expansion of electrostatic interactions), which energy frequently exceeds 10 kcal/mol.

Hydrogen bonding is the next type of interactions proven to contribute significantly to stabilization of protein structure and to the organization of intermolecular complexes (ca. 3 to 5 kcal/mol). The energy of a single hydrogen bond (H-bond) in ligand-protein complexes depends both on the type of hydrogen bond donor (D) and acceptor (A) and on the overall geometry of the D-H...A system. The shortest H-bonds are observed for oxygen acting as a donor, OH...O (2.70Å) and OH...N (2.88Å), respectively. When nitrogen is an H-bond donor, its distance to an acceptor is longer: NH...O (3.04Å) and NH...N (3.10Å), respectively [2]. Subsequently, numerous non-canonical weak H-bonds have been

identified by statistical analyses of protein structures, and previously identified in crystals of low-mass compounds. This includes, amongst others, a  $\pi$  electron system acting as an H-bond acceptor [3–5], and an aliphatic carbon acting as an H-bond donor [4,6,7].

During the last decade, halogen bonding (X-bond, see [8] for review) has been recognized to play a similar role as H-bonding in protein-ligand complexes. Halogen bonds have been identified in many crystal structures of low-mass compounds and their supramolecular ensembles [8–17], as well as in complexes of biomolecules with halogenated ligands [18–20]. Bearing in mind that numerous natural drugs, and an increasing number of synthetic drug candidates, are halogenated [21–23]; understanding the nature and thermodynamics of halogen bonding should contribute to rational drug design. Currently, halogenated compounds are widely used in screening libraries, and comprise almost 20% of low-mass protein ligands listed in the Protein Data Bank (PDB). The role of halogenated ligands in biological systems has been widely reviewed, amongst others, by Auffinger *et al.* [18], Parisini *et al.* [24], Rendine *et al.*, Voth & Ho [25], Voth *et al.* [26], Wilcken *et al.* [27] and Poznański & Shugar [28].

However, there is some controversy about the energy of a halogen bond. In aqueous medium estimates of intra- or intermolecular halogen bonds vary from 0.2 [29] up to 5–8 kcal/mol [25], suggesting that, in biological systems, halogen- and hydrogen bonds may be of similar strength. However, the

apparently largest values for an X-bond were obtained *ab initio* for  $\text{CF}_3\text{-X}\cdots\text{NH}_3$  systems: 2.3, 4.7 and 6.4 kcal/mol for  $\text{X} = \text{Cl}$ ,  $\text{Br}$  and  $\text{I}$ , respectively [30]. These values agree with energies estimated by IR spectroscopy, for  $\text{CF}_3\text{-X}\cdots\text{N}(\text{CH}_3)_3$  in liquid noble gases, which are the best models for a non-polar solvent that does not interfere with solute-solute interactions: 2.1, 4.4 and 6.8 kcal/mol for X-bonds involving  $\text{Cl}$ ,  $\text{Br}$  and  $\text{I}$ , respectively [31–33]. These halogen bonds can compete with hydrogen bonding, as well documented for numerous low-mass complexes *in silico* [34,35], in solution [36,37], and in the solid state [17,38,39].

Due to this revived interest in halogen bonding, the observed effect of a halogen atom on structural stability [25,40], or ligand binding [41,42], has been attributed to a direct effect of halogen bonding only. However, the strong electronegative and hydrophobic character of halogen atoms may also contribute to intra- and intermolecular interactions. For example we have recently shown that inhibitory activities ( $\text{IC}_{50}$ ) against protein kinase  $\text{CK2}\alpha$  observed for a series of benzotriazoles brominated on the benzene ring can be explained by a balance of hydrophobic and electrostatic interactions [43].

Halogenation modulates electron density on proximal donors and acceptors of hydrogen bonds [44], as well as changes in protonation equilibria of proximal dissociable groups [45,46]. Well-known examples include the decrease in  $\text{pK}_a$  of fluorinated alcohols [47]: ethanol vs. 2,2',2''-trifluoroethanol ( $\text{pK}_a$  decrease by 3.45) and phenol vs. pentafluorophenol ( $\text{pK}_a$  decrease by 4.4).

Likewise, halogenation of uracil was shown to reduce the hydrogen-bond-accepting, and to increase the hydrogen-bond-donating, capabilities of halogenated DNA bases [48–50]. Other illustrative examples of the direct effect of a halogen atom on strengthening of proximal hydrogen bonds are brominated natural [51,52] and synthetic [53–55] DNA, which were found to be much more stable than the corresponding non-brominated analogues.

A further example of the foregoing is the report of Xu *et al.* [42] on a series of closely related halogenated inhibitors of phosphodiesterase 5 (PDE5). There are five PDB structures of PDE5 with bound inhibitors that differ only by substitution of a hydrogen atom by  $\text{F}$ ,  $\text{Cl}$ ,  $\text{Br}$  or  $\text{I}$ , respectively (see PDB entries 3TSE, 3SHY, 3SHZ, 3SIE, 3TSF). Location of these closely related ligands in the binding pocket was judged to be stabilized, besides two hydrogen bonds and numerous vdW interactions, by intermolecular interaction between the halogen atom ( $\text{X}$ ) and the hydroxyl oxygen of Tyr612. However, there are also two intermolecular hydrogen bonds between the side-chain of Gln817, and ligands  $\text{Od}$  and  $\text{Ns}$ , respectively, both proximal to the halogen atom (3 chemical bonds distance). Changes in the lengths of these, upon variation of the halogen substituent, reflects eventual strengthening of these H-bonds, not taken into account by the authors [42].

To our knowledge, no high-throughput analyses addressing the effect of a halogen atom on proximal hydrogen bond(s) have yet been reported for ligand-protein systems [13,19,24,25,56–61]. We herein analyze the effect of the halogen atom of a halogenated ligand on the lengths of hydrogen bonds (both proximal and distal), identified in two families of proteins: protein kinases (EC 2.7) and acyltransferases (EC 2.3).

## Results and Discussion

### 1 PDB Screening

To avoid the eventual effect of protein-specific ligand binding modes, two protein families were analyzed. Protein kinases (EC 2.7) and acyltransferases (EC 2.3) are the proteins for which the largest number of structures with halogenated ligands was

identified in the PDB. All complexes of ligands with proteins of these two families were analyzed. A total of 3852 PDB entries was found, 3187 with non-halogenated ligands, LH, 505 with fluorinated ones, LF, and 408 containing halogenated (not fluorinated) ligands, LX, contributing together to 1228 records of acyltransferases and 2624 records of protein kinases. After exclusion of protein sulfur as either hydrogen bond acceptor or donor, a total number of 24470 hydrogen bonds was identified, 1930 with fluorinated, 1390 with halogenated ligands, and 21150 with non-halogenated ligands, respectively. In addition, 41 intermolecular H-bonds to protein sulfur (Met or Cys) were excluded from further analyses (see Table 1 for the short statistics).

### 2 Distribution of Hydrogen Bond Lengths as a Function of H-bond Topology

Hydrogen bonds were grouped according to eight possible topologies of hydrogen bond donor-acceptor pairs, i.e.  $\text{N-H}_{\text{lig}}\cdots\text{O}_{\text{prot}}$  ( $\text{NH}\cdots\text{O}$ ),  $\text{N}_{\text{lig}}\cdots\text{H-O}_{\text{prot}}$  ( $\text{N}\cdots\text{HO}$ ),  $\text{O-H}_{\text{lig}}\cdots\text{O}_{\text{prot}}$  ( $\text{OH}\cdots\text{O}$ ),  $\text{O}_{\text{lig}}\cdots\text{H-O}_{\text{prot}}$  ( $\text{O}\cdots\text{HO}$ ),  $\text{N-H}_{\text{lig}}\cdots\text{N}_{\text{prot}}$  ( $\text{NH}\cdots\text{N}$ ),  $\text{N}_{\text{lig}}\cdots\text{H-N}_{\text{prot}}$  ( $\text{N}\cdots\text{HN}$ ),  $\text{O-H}_{\text{lig}}\cdots\text{N}_{\text{prot}}$  ( $\text{OH}\cdots\text{N}$ ), and  $\text{O}_{\text{lig}}\cdots\text{H-N}_{\text{prot}}$  ( $\text{O}\cdots\text{HN}$ ). The distributions obtained for non-halogenated ligands are presented in Figure 1. For ligands acting as H-bond donors, two left shifted distributions identify the topologies of the shortest H-bonds types (i.e.  $\text{OH}\cdots\text{N}$  and  $\text{OH}\cdots\text{O}$ ), medians of which are the lowest (Figure 1A). The intermediate distribution ( $\text{NH}\cdots\text{O}$ ) is also characterized by a higher median. The last one ( $\text{NH}\cdots\text{N}$ ) is much more shifted to the right, and its median is the highest. The order of distributions strictly correlates with the average strength of H-bonds: the shorter is donor-to-acceptor distance, the stronger is the H-bond. This agrees with a common order of an average enthalpy of formation of various types of hydrogen bonds in biomolecules:  $\text{OH}\cdots\text{N}$ , 6.9 kcal/mol;  $\text{OH}\cdots\text{O}$ , 5.0 kcal/mol;  $\text{NH}\cdots\text{N}$ , 3.1 kcal/mol, and  $\text{NH}\cdots\text{O}$ , 1.9 kcal/mol, respectively [62].

Inspection of cumulative distributions for non-halogenated ligands acting as H-bond acceptors (see Figure 1B) clearly demonstrated that hydrogen bonds involving two oxygen atoms are statistically the shortest, as evidenced by the left-shift of the cumulative distribution function towards shorter distances (and also smaller medians). H-bonds between two nitrogen atoms are the longest, and the two remaining types of hydrogen bonds of mixed topology,  $\text{N}\cdots\text{HO}$  and  $\text{O}\cdots\text{HN}$  are intermediate in their lengths.

Formal statistical analysis clearly demonstrated that most topologies of an H-bond differ significantly according to the H-bond donor-to-acceptor distance distribution. Interestingly, these differences are observed even between pairs in which the proton is swapped between the ligand and the protein. Hence, the distribution of  $\text{OH}\cdots\text{O}$  ( $\text{OH}_{\text{lig}}\cdots\text{O}_{\text{prot}}$ ) differs from that of an  $\text{O}\cdots\text{HO}$  ( $\text{O}_{\text{lig}}\cdots\text{HO}_{\text{prot}}$ ),  $p < 10^{-2}$ . Similarly  $\text{OH}\cdots\text{N}$  differs from  $\text{O}\cdots\text{HN}$  ( $p < 10^{-10}$ ) and  $\text{NH}\cdots\text{O}$  differs from  $\text{N}\cdots\text{HO}$  ( $p = 0.05$ ). This significant asymmetry may be a consequence of overrepresentation of several types of H-bond donors and acceptors in proteins. Namely, oxygen acceptors are dominated by backbone carbonyls, oxygen donors are Ser, Thr and Tyr hydroxyl groups, nitrogen donors are mainly backbone amides, and nitrogen donors are solely the imidazole of His, which are rare in proteins. In consequence, the protein nitrogen H-bond acceptors are strongly underrepresented (see column 'n' in Table 2).

The foregoing is valid for all types of ligands acting as either acceptor or donor of an H-bond (see Figure S1 and Table S1). The statistical significance of the observed differences in donor-acceptor distance distributions was evaluated, separately for the three types of ligands, with the aid of the non-parametric Kruskal-

**Table 1.** Occurrence of various types of hydrogen bonds identified in two groups of proteins (Enzyme Classification, EC, 2.3 or 2.7) for three types of ligands.

|              | Ligand type                   |       |                      |       |                  |       |                                      |       |
|--------------|-------------------------------|-------|----------------------|-------|------------------|-------|--------------------------------------|-------|
|              | Ligand contribution to H-bond |       | Non-halogenated (LH) |       | Fluorinated (LF) |       | Halogenated but not fluorinated (LX) |       |
|              | EC                            | Total | EC                   | Total | EC               | Total | EC                                   | Total |
|              | 2.3                           | 2.7   | 2.3                  | 2.7   | 2.3              | 2.7   | 2.3                                  | 2.7   |
| N - acceptor | 87                            | 1764  | 23                   | 339   | 6                | 294   | 300                                  |       |
| N - donor    | 2737                          | 2939  | 355                  | 490   | 237              | 424   | 661                                  |       |
| O - acceptor | 3329                          | 6708  | 266                  | 344   | 124              | 218   | 342                                  |       |
| O - donor    | 1112                          | 2510  | 82                   | 34    | 36               | 53    | 89                                   |       |
| Total        | 7265                          | 13921 | 726                  | 1207  | 403              | 989   | 1392                                 |       |

These data include 41 hydrogen bonds to protein sulfur, which were excluded from further analyses.  
doi:10.1371/journal.pone.0099984.t001

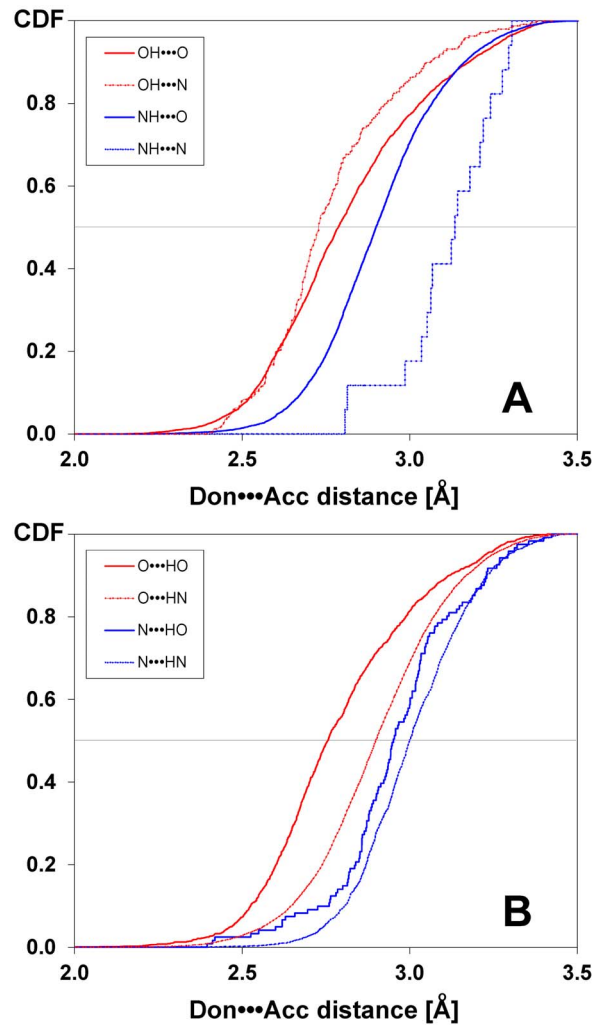

**Figure 1.** Cumulative distributions of donor-acceptor distances determined for various types of intermolecular hydrogen bond donor-acceptor pairs identified in complexes of proteins with non-halogenated ligands, in which the ligand is either a hydrogen bond donor (A) or acceptor (B).  
doi:10.1371/journal.pone.0099984.g001

Wallis test ( $p < 10^{-9}$ ). Since these differences were found globally significant, the post-hoc approach was used to identify those pairs that significantly differ. Estimated p-values, together with the number of identified H-bonds, and mean rank of donor-acceptor distances, are presented in Table 2 and Table S1.

The majority of the analyzed pairs of distributions for non-halogenated ligands (LH) differ significantly (23 out of 28, assuming a significance level of 0.05). In the case of fluorinated (LF) and other halogenated ligands (LX), the small number of identified hydrogen bonds of the type  $N \cdots HO$  ( $N_{\text{lig}} \cdots H-O_{\text{prot}}$  with  $n = 4$  or 2 H-bonds found for LH and LX ligands, respectively) and  $NH \cdots N$  ( $NH_{\text{lig}} \cdots N_{\text{prot}}$  with  $n = 1$  and 0, respectively), precluded analysis of these two types of hydrogen bonds. For the remaining groups, distributions for 11 out of 14 possible pairs differ significantly both for fluorinated (LF) and otherwise halogenated (LX) ligands (Table S1). In this context, the hydrogen bond lengths to halogenated or non-halogenated ligands must be compared separately for eight groups representing all possible topologies of hydrogen bonding in ligand-protein complexes. Otherwise, the differences in representation of various types of

**Table 2.** Results of the Kruskal-Wallis (K-W) test in the analysis of the topology-dependent length of a hydrogen bond between a non-halogenated ligand (LH) and a protein: for each pair of hydrogen bond acceptor/donor pair the p-value for the null hypothesis that both distributions are identical was estimated according to the two-tailed multiple comparison.

| H-bond topology                                                                                 | n    | Mean rank | H-bond topology (ligand • protein) |                         |                         |                         |                         |                         |                         |                         |
|-------------------------------------------------------------------------------------------------|------|-----------|------------------------------------|-------------------------|-------------------------|-------------------------|-------------------------|-------------------------|-------------------------|-------------------------|
|                                                                                                 |      |           | OH••O                              | OH••N                   | NH••O                   | NH••N                   | O••HO                   | O••HN                   | N••HO                   | N••HN                   |
| <b>LH: K-W test for non-halogenated ligands: H(7, N = 21150) = 1519; p &lt; 10<sup>-9</sup></b> |      |           |                                    |                         |                         |                         |                         |                         |                         |                         |
| OH••O                                                                                           | 3358 | 8378      | -                                  | 1.9 · 10 <sup>-3</sup>  | < 1 · 10 <sup>-10</sup> | 1.6 · 10 <sup>-7</sup>  | 7.6 · 10 <sup>-3</sup>  | < 1 · 10 <sup>-10</sup> | < 1 · 10 <sup>-10</sup> | < 1 · 10 <sup>-10</sup> |
| OH••N                                                                                           | 251  | 6787      | 1.9 · 10 <sup>-3</sup>             | -                       | < 1 · 10 <sup>-10</sup> | 6.2 · 10 <sup>-10</sup> | 1                       | < 1 · 10 <sup>-10</sup> | < 1 · 10 <sup>-10</sup> | < 1 · 10 <sup>-10</sup> |
| NH••O                                                                                           | 5670 | 11015     | < 1 · 10 <sup>-10</sup>            | < 1 · 10 <sup>-10</sup> | -                       | 1.4 · 10 <sup>-3</sup>  | < 1 · 10 <sup>-10</sup> | 1                       | 0.05                    | < 1 · 10 <sup>-10</sup> |
| NH••N                                                                                           | 17   | 17026     | 1.6 · 10 <sup>-7</sup>             | 6.2 · 10 <sup>-10</sup> | 1.4 · 10 <sup>-3</sup>  | -                       | 9.1 · 10 <sup>-9</sup>  | 1.1 · 10 <sup>-3</sup>  | 0.20                    | 1                       |
| O••HO                                                                                           | 1331 | 7659      | 7.6 · 10 <sup>-3</sup>             | 1                       | < 1 · 10 <sup>-10</sup> | 9.1 · 10 <sup>-9</sup>  | -                       | < 1 · 10 <sup>-10</sup> | < 1 · 10 <sup>-10</sup> | < 1 · 10 <sup>-10</sup> |
| O••HN                                                                                           | 8675 | 10943     | < 1 · 10 <sup>-10</sup>            | < 1 · 10 <sup>-10</sup> | 1                       | 1.1 · 10 <sup>-3</sup>  | < 1 · 10 <sup>-10</sup> | -                       | 0.03                    | < 1 · 10 <sup>-10</sup> |
| N••HO                                                                                           | 121  | 12769     | < 1 · 10 <sup>-10</sup>            | < 1 · 10 <sup>-10</sup> | 0.05                    | 0.20                    | < 1 · 10 <sup>-10</sup> | < 1 · 10 <sup>-10</sup> | -                       | 0.47                    |
| N••HN                                                                                           | 1727 | 14140     | < 1 · 10 <sup>-10</sup>            | < 1 · 10 <sup>-10</sup> | < 1 · 10 <sup>-10</sup> | 1                       | < 1 · 10 <sup>-10</sup> | < 1 · 10 <sup>-10</sup> | 0.47                    | -                       |

The values marked in red denote the pairs of distributions that differ one from the other, with  $\alpha = 0.05$ . Additionally, the identified number of each type of hydrogen bond, n, and mean rank test are presented. doi:10.1371/journal.pone.0099984.t002

hydrogen bonds would contribute in an uncontrolled manner to the observed distance distributions.

The most common types of ligand-protein intermolecular hydrogen bonds in the PDB, NH•••O and O•••HN, display almost identical distributions for non-halogenated ligands (LH, see Figure 2A), but become visibly different for fluorinated (LF) or otherwise halogenated (LX) ligands (see Figure 2B, C). In both latter cases the distributions of the NH•••O hydrogen bond lengths are shifted left relative to those of the O•••HN. However, for fluorinated ligands the medians are, by chance, almost equal. The observed differences are statistically significant only for halogenated ligands ( $p = 0.03$ ), but they are also probable for fluorinated ligands ( $p = 0.09$ ) (see Table 2). It should be stressed that the observed differences in medians for fluorinated (LF) and halogenated (LX) ligands (0.01 and 0.03 Å respectively, see Table 3) exceed the precision of PDB records. Overall, this clearly shows that ligand substitution with electronegative atoms (F, Cl, Br, I) results in variation of the lengths of intermolecular hydrogen bonds. Moreover, this effect strongly depends on the type of hydrogen bond (Table S1).

### 3 Hydrogen Bonding to Halogenated or Fluorinated vs. Non-halogenated Ligands

The effect of a halogen atom on the distribution of hydrogen bond lengths was analyzed separately for the four most abundant types of hydrogen bonds: OH•••O, NH•••O, N•••HN and O•••HN (i.e. a protein oxygen being a hydrogen bond acceptor and a protein nitrogen being a hydrogen bond donor, see Table 3 for numbers). Cumulative distributions of hydrogen bond lengths estimated for fluorinated (LF) and otherwise halogenated (LX) ligands are, for some of the H-bond topologies, shifted towards shorter distances in comparison to non-halogenated ligands (LH). It is shown in Figure 3, and also confirmed by lower mean ranks collected in Table 3. Substitution with halogen atom mostly affects the lengths of OH•••O hydrogen bonds (Figure 3C). Smaller, but still visible, changes are observed for NH•••O (Figure 3A) and N•••HN (Figure 3B), while almost no variations are observed for O•••HN hydrogen bonds (Figure 3D). This is fully confirmed by the Mann-Whitney U test (see Table 3, and Table S2 for all H-bond topologies). Amongst them, hydrogen bonds to fluorinated ligands (LF) are significantly shorter for five out of seven tested pairs of distributions, while halogenated ligands (LX) differ significantly from non-halogenated ones (LH) only for the NH•••O type. It should be stressed that the medians for H-bond length with halogenated ligands (either LF or LX) are generally lower than those for non-halogenated ones (LH). This can also be easily checked via mean ranks (LX < LH and LF < LH).

In general the effect of fluorine vs. other halogens atoms follows the electronegativity scale. Fluorine changes properties of nitrogen both as acceptor and donor of hydrogen, and oxygen as donor of a hydrogen bond, whereas chlorine, bromine and iodine affect only hydrogen bond donors (both oxygen and nitrogen). The latter effect is clearly detectable for medians (decrease by 0.06 and 0.03 Å for OH•••O and NH•••O, respectively) and is statistically significant ( $p = 0.02$  and  $p < 10^{-5}$ , see Table 3 for details). No variations are observed for halogenated ligands (LX) acting as H-bond acceptor. It is worth noting that the observed differences agree with *ab initio* simulations of base pairing of halogenated uracil with adenine [48].

**Table 3.** Comparison of distributions of hydrogen bond lengths, calculated separately for fluorinated (LF), otherwise halogenated (LX), and non-halogenated ligands (LH), for the four most represented topologies of protein-ligand hydrogen bonds.

| H-bond topology | n    | Mean rank |           | U statistics | Z <sub>U</sub> | p-value     | Median [Å]                 |              | p-value      |                 |                            |
|-----------------|------|-----------|-----------|--------------|----------------|-------------|----------------------------|--------------|--------------|-----------------|----------------------------|
|                 |      | LF        | LH        |              |                |             | LF                         | LH           |              | Δ(LF–LH)        |                            |
| <b>OH...O</b>   | 3358 | 103       | 1743.9    | 1309.5       | 129525         | <b>4.35</b> | <b>1.4·10<sup>-5</sup></b> | <b>2.787</b> | <b>2.668</b> | <b>-0.119</b>   | <b>7.2·10<sup>-6</sup></b> |
| <b>NH...O</b>   | 5670 | 842       | 3286.9    | 3051.9       | 2214771        | <b>3.38</b> | <b>7.1·10<sup>-4</sup></b> | 2.899        | 2.885        | -0.014          | 0.18                       |
| O...HN          | 8675 | 571       | 4616.4    | 4731.6       | 2414967        | -1.00       | 0.32                       | 2.900        | 2.895        | -0.005          | 0.76                       |
| <b>N...HN</b>   | 1727 | 357       | 1060.4    | 956.0        | 277400         | <b>2.98</b> | <b>2.9·10<sup>-3</sup></b> | <b>3.001</b> | <b>2.976</b> | <b>-0.025</b>   | <b>0.03</b>                |
|                 |      | <b>LH</b> | <b>LX</b> | <b>LH</b>    | <b>LX</b>      |             |                            | <b>LH</b>    | <b>LX</b>    | <b>Δ(LX–LH)</b> |                            |
| OH...O          | 3358 | 72        | 1717.0    | 1645.5       | 115847         | 0.61        | 0.54                       | 2.787        | 2.769        | -0.018          | 0.35                       |
| <b>NH...O</b>   | 5670 | 659       | 3201.7    | 2849.2       | 1660152        | <b>4.69</b> | <b>2.8·10<sup>-6</sup></b> | <b>2.899</b> | <b>2.864</b> | <b>-0.035</b>   | <b>4.9·10<sup>-5</sup></b> |
| O...HN          | 8675 | 317       | 4492.7    | 4601.6       | 1341680        | -0.73       | 0.46                       | 2.900        | 2.897        | -0.003          | 0.69                       |
| N...HN          | 1727 | 298       | 1014.2    | 1006.0       | 255250         | 0.22        | 0.82                       | 3.001        | 2.998        | -0.003          | 0.81                       |

Those for which hydrogen bonds to LX/LF ligands are, according to the Mann-Whitney U test, significantly shorter (assuming  $\alpha = 0.05$ ) are highlighted. Note that for each pair of H-bond distributions, a smaller mean rank indicates statistically shorter donor-acceptor distances, or, equivalently, positive values of Z<sub>U</sub> statistics indicate these types of H-bonds, which are shorter to halogenated ligands. The corresponding medians, and their differences with statistical significances (p), are also presented.  
doi:10.1371/journal.pone.0099984.t003

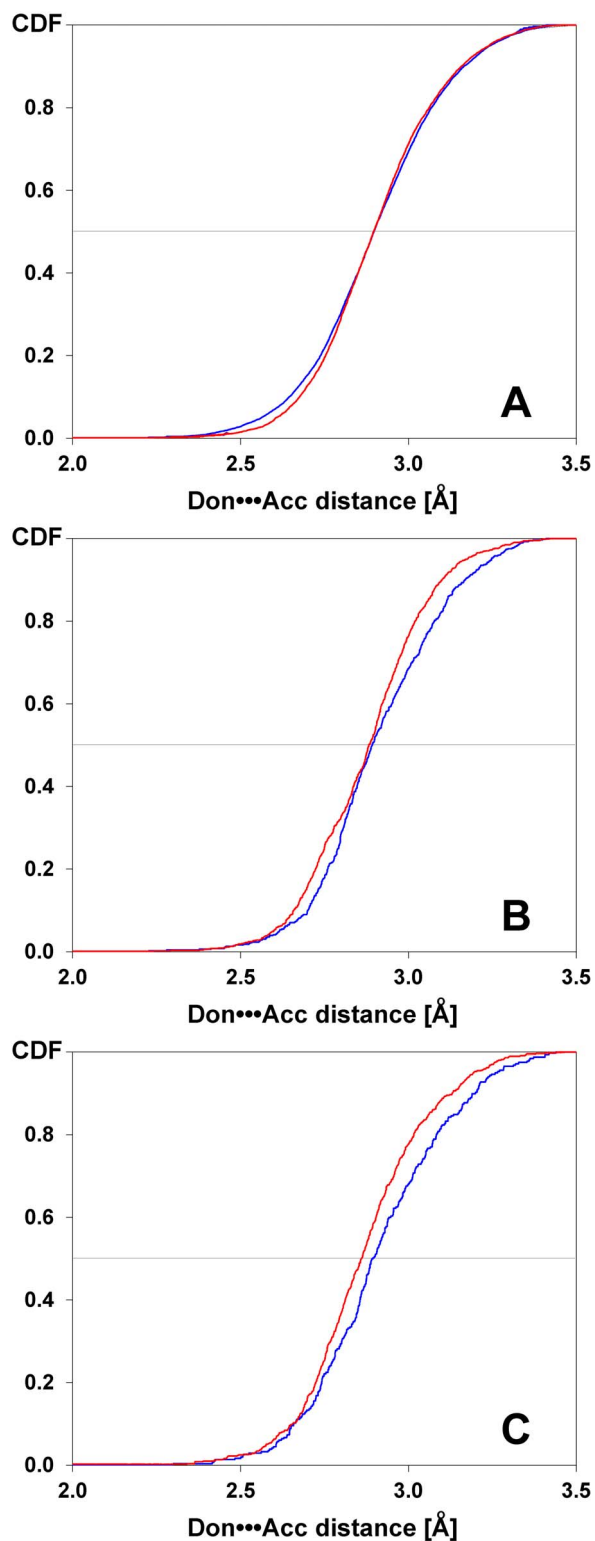

**Figure 2. Cumulative distributions of NH...O (blue) and O...HN (red) intermolecular hydrogen bonds identified in protein complexes with non-halogenated (A, LH), fluorinated (B, LF) and otherwise halogenated ligands (C, LX). See Table 2 for details.** doi:10.1371/journal.pone.0099984.g002

#### 4 Validation of the Differences Observed for Distributions of H-bond Donor-acceptor Distance

Proteins form H-bonds *via* various types of donors and acceptors. In view of the adopted approach, all types of hydrogen bonds should be analyzed separately, but the number of actually identified interactions with halogenated ligands makes results of such detailed analysis statistically insignificant. However, the large subset of H-bonds between ligands and protein backbone (i.e. carbonyl oxygen and amide nitrogen) enables analysis of much more homogenous subsets of protein-ligand interactions. The results generally agree with those obtained for all protein H-bond acceptors and donors (see Figure S2), confirming again the statistical significance of the effect of a halogen atom on lengths of intermolecular hydrogen bonds between a halogenated ligand and a protein.

A key point of the presented analysis is the significance of the results presented in the context of the quality of PDB structures. In fact, there are only a very limited number of X-ray structures of closely related halogenated ligands bound to the same protein that can be compared directly (e.g. PDE5 mentioned in the Introduction). Moreover, the resolution of X-ray structures precludes any direct interpretation of distances that differ by an order of 0.01 Å. All donor-acceptor distances must be regarded biased, but differences between observed distributions, as presented in Figures 1–3, may be considered as significant, since there is no factor explaining any systematic differences in biases for halogenated and non-halogenated ligands. However, to assess an eventual effect of quality of structures on the significance of observed differences in distance distributions, the analyses were repeated for two subsets of high-resolution X-ray structures, resolutions of which were better than 2.0 and 1.5 Å, respectively, and the general tendency to strengthening of H-bonds between protein and halogenated ligands (both LF and LX) acting as hydrogen bond donor was preserved (see Table S3).

#### Materials and Methods

##### Structural Data

The Protein Data Bank (PDB, [63]) was searched to identify all entries of protein kinases (EC 2.7) and acyltransferases (EC 2.3). Those containing ligands with at least one oxygen/nitrogen bound to a carbon atom were subjected to further analysis.

##### Structural Analysis

All analyses were performed with the aid of the Yasara Model package [64]. For each class of protein, all intermolecular ligand-protein hydrogen bonds were identified, using 3.5 Å as a threshold for the distance between putative hydrogen bond donor and acceptor. The distributions of donor-acceptor distances were determined separately for three classes of ligands: non-halogenated (LH), fluorinated (LF) and others that are halogenated, but not fluorinated (LX). These data were then assigned to one of eight groups, according to the topology of the hydrogen bond. The latter was defined according to the ligand atom (oxygen or nitrogen) being either donor or acceptor of a hydrogen bond with protein nitrogen or oxygen. Since fluorinated ligands (LF) are the internal reference for the effect of other halogen atoms that may contribute in halogen bonding (LX), all heterogenic ligands, which were simultaneously fluorinated and modified with chlorine/bromine/iodine, were excluded from the analysis.

The most abundant types of hydrogen bonds (i.e.  $\text{NH}_{\text{lig}} \cdots \text{O}_{\text{prot}}$ ,  $\text{OH}_{\text{lig}} \cdots \text{O}_{\text{prot}}$ ,  $\text{O}_{\text{lig}} \cdots \text{HN}_{\text{prot}}$ , and  $\text{N}_{\text{lig}} \cdots \text{HN}_{\text{prot}}$ ) were additionally analyzed according to homogenous substitutions with only Fluorine; Chlorine, Bromine or Iodine. All heterogeneously

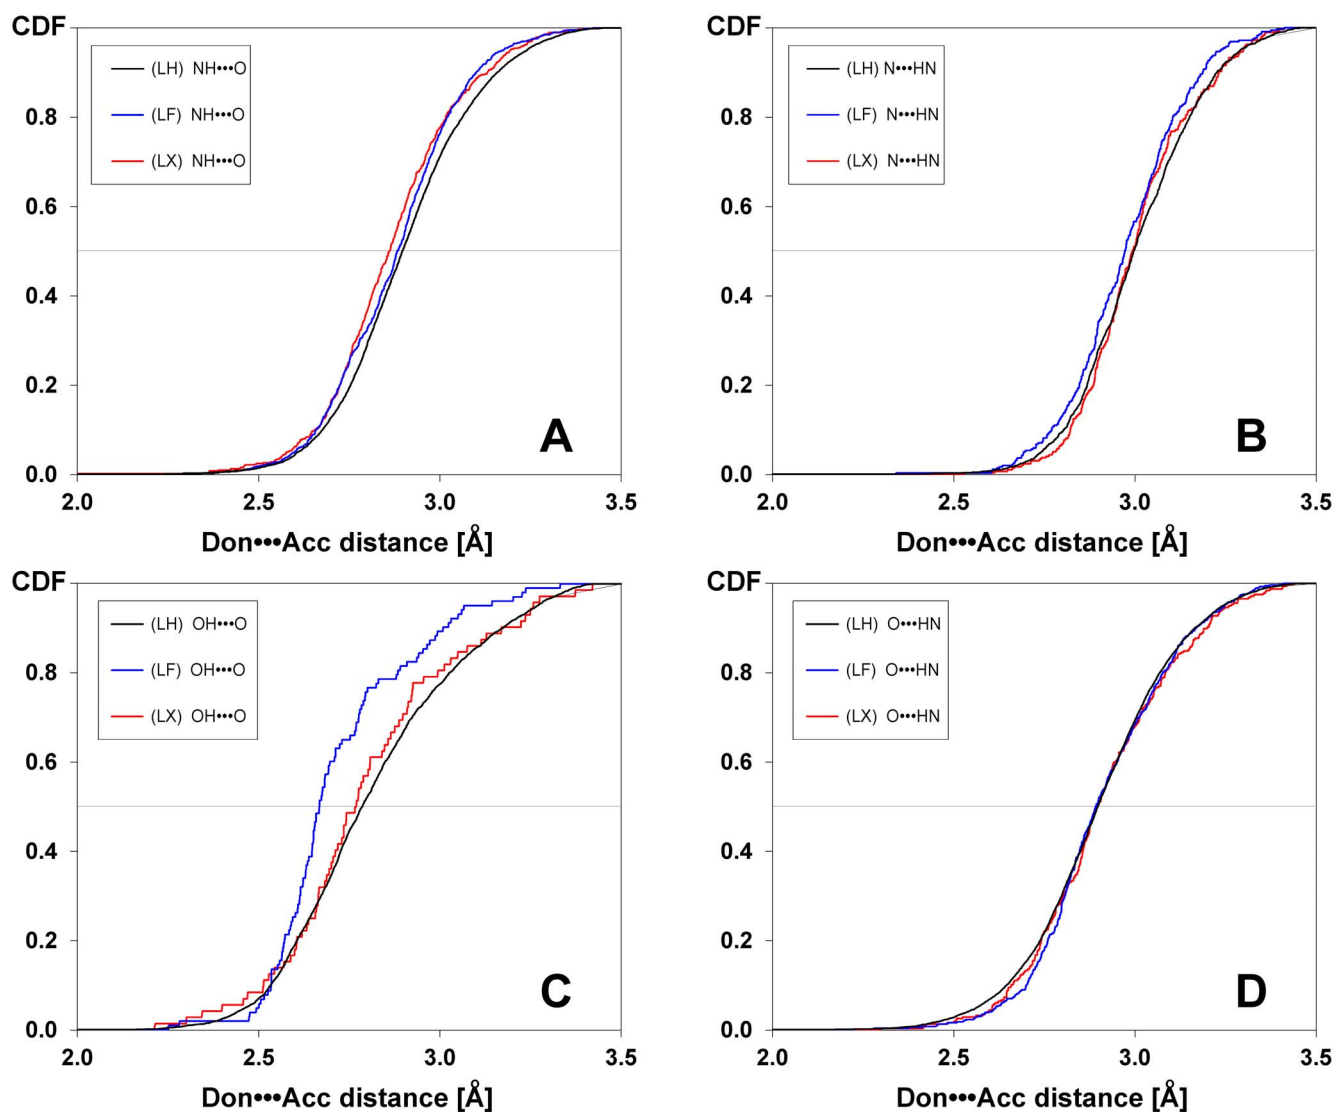

**Figure 3. Effect of a halogen atom on cumulative distributions determined for the four most abundant types of hydrogen bond donor-acceptor pairs: NH...O (A), OH...O (B), N...HN (C), and O...HN (D), respectively.** The distributions estimated for non-halogenated (LH), fluorinated (LF) and other halogenated ligands (LX) are presented in black, blue and green, respectively. See Table 3 for details. doi:10.1371/journal.pone.0099984.g003

substituted ligands (e.g. bromo-fluoro or chloro-iodo) were excluded from this analysis.

Multiple protein molecules in the crystal cell, as well as objects displaying partially occupied forms (i.e. side-chain rotamers or ligand locations) were analyzed separately. Hydrogen bonds with water molecules were not analyzed.

### Statistical Analysis

To circumvent the eventual requirement of categorization, all distributions are presented in a cumulative manner as a CDF (cumulative distribution function), which is the integral of a distribution function. This form of presentation helps in visual comparison of various distributions, overcoming the problem of balancing the resolution (i.e. the number of bins in a histogram) and statistical noise (i.e. numbers of counts in bins). In all figures the curve most shifted to the left identifies the dataset characterized by the shortest donor-acceptor distances.

Since, according to the Anderson-Darling test [65], most distributions of hydrogen bond donor-acceptor distances were

found not Gaussian (data not shown), the statistical significance of observed differences was estimated according to nonparametric tests. For comparison of two distributions the Mann-Whitney U test [66] was used. The Kruskal-Wallis test [67], which is a generalization of the U-test, was applied for 3 or more groups.

The Mann-Whitney U-test is a first choice alternative to Student's t-test, when applied to two data-sets that are not necessarily normally distributed. Formally, it detects differences in shape of tested distributions: each group is characterized by its mean rank, i.e. the average position of its components in the list created by sorting both datasets. For each pair of distributions, the smaller value of the mean rank ( $R_i$ ) identifies the group that is characterized by a shorter distance (see Tables 2, 3). The value of  $U_i$  is the corresponding test statistics, ( $U_i = n_i * [R_i - (n_i + 1) / 2]$ ;  $n_i$  is the size of dataset  $i$ ), and  $Z_U$  is the associated value of the standard Gaussian distribution. Positive  $Z_U$  value (equivalently higher mean rank for LH) indicates that distances for halogenated ligands are shorter, and the corresponding p-value estimates the statistical significance of observed differences. The medians were also

compared for selected pairs of distributions according to the appropriate median test [68].

All analyses were performed using the Statistica 10 [69]. Null hypotheses that given distributions do not differ one from the other were tested at a significance level,  $\alpha = 0.05$ , and those with p-values below 0.05 were rejected, and distributions regarded as different.

## Conclusions

Hydrogen bond length distributions in protein-ligand complexes are significantly different for non-halogenated ligands (LH) compared to halogenated ones (LF, LX). The H-bond donor-acceptor distances are significantly shorter for a halogenated ligand acting as a hydrogen bond donor (at significance level 0.05). However H-bond lengths seem irrelevant for halogenations, when the ligand oxygen is a hydrogen bond acceptor. All these observations are consistent with the idea that halogenation increases the acidity of proximal amino/imino/hydroxyl groups and thus makes them better, i.e. stronger, H-bond donors.

## Supporting Information

**Figure S1** Cumulative distributions of donor-acceptor distances determined for various types of intermolecular hydrogen bond donor-acceptor pairs identified in complexes of proteins with non-halogenated ligands, in which the ligand is either a hydrogen bond donor (A, C, E) or acceptor (B, D, F); determined for non-halogenated, LH, (A, B), fluorinated, LF, (C, D), and otherwise halogenated (i.e. not fluorinated), LX, ligands (E, F). (TIF)

**Figure S2** Effect of a halogen atom on cumulative distributions determined for the donor-acceptor pairs determined for hydrogen bonds between ligand and protein backbone (carbonyl oxygen: A, C or amide nitrogen: B, D). The distributions estimated for

non-halogenated, fluorinated and otherwise halogenated ligands are presented in black, blue and red, respectively. (TIF)

**Table S1** Results of the Kruskal-Wallis (K-W) test in the analysis of the topology-dependent length of a hydrogen bond: for each pair of hydrogen bond acceptor/donor pair the p-value for the null hypothesis that both distributions are identical was estimated according to the two-tailed multiple comparison. The values marked in bold denote the pairs of distributions that differ one from the other, with  $\alpha = 0.05$ . Additionally, the identified number of each type of hydrogen bond, n, and mean rank test are presented. (DOC)

**Table S2** Comparison of distributions of hydrogen bond lengths, calculated separately for halogenated but not fluorinated (LX), fluorinated (LF), and non-halogenated ligands (LH), for eight possible topologies of protein-ligand hydrogen bonds. Those for which hydrogen bonds to LX/LF ligands are, according to the Mann-Whitney U test, significantly shorter (assuming  $\alpha = 0.05$ ) are highlighted. Note that for each pair of H-bond distributions, a smaller mean rank indicates statistically shorter donor-acceptor distances, or, equivalently, positive values of  $Z_U$  statistics indicate these types of H-bonds, which are longer to nonhalogenated ligands. The corresponding medians, and their differences with statistical significances (p), are also presented. (DOC)

**Table S3** Comparison of distributions of hydrogen bond lengths, calculated separately for ligands fluorinated (LF), otherwise halogenated (LX), and non-halogenated (LH), for hydrogen bonds between ligand and protein that were identified in high-resolution X-ray structures. (DOC)

## Author Contributions

Conceived and designed the experiments: JP DS. Analyzed the data: JP AP. Wrote the paper: JP AP DS.

## References

- Koshland DE (1994) The key-lock theory and the induced fit theory. *Angewandte Chemie-International Edition* 33: 2375–2378.
- Stryer L (1995) *Biochemistry* (4th edition): W. H. Freeman & Company.
- Atwood JL, Hamada F, Robinson KD, Orr GW, Vincent RL (1991) X-ray diffraction evidence for aromatic  $\pi$  hydrogen-bonding to water. *Nature* 349: 683–684.
- Aakeroy CB, Seddon KR (1993) The hydrogen-bond and crystal engineering. *Chemical Society Reviews* 22: 397–407.
- Steiner T, Koellner G (2001) Hydrogen bonds with  $\pi$ -acceptors in proteins: Frequencies and role in stabilizing local 3D structures. *Journal of Molecular Biology* 305: 535–557.
- Taylor R, Kennard O (1982) Crystallographic evidence for the existence of C-H $\cdots$ O, C-H $\cdots$ N, and C-H $\cdots$ C hydrogen-bonds. *Journal of the American Chemical Society* 104: 5063–5070.
- Desiraju GR (1991) The C-H $\cdots$ O hydrogen-bond in crystals - what it is. *Accounts of Chemical Research* 24: 290–296.
- Metrangolo P, Meyer F, Pilati T, Resnati G, Terraneo G (2008) Halogen bonding in supramolecular chemistry. *Angewandte Chemie-International Edition* 47: 6114–6127.
- Hassel O, Hvoslef J (1954) The Structure of Bromine 1,4-Dioxanate. *Acta Chemica Scandinavica* 8: 873–873.
- Bent HA (1968) Structural chemistry of donor-acceptor interactions. *Chemical Reviews* 68: 587–648.
- Desiraju GR (1995) Supramolecular synthons in crystal engineering - a new organic-synthesis. *Angewandte Chemie-International Edition in English* 34: 2311–2327.
- Metrangolo P, Resnati G (2001) Halogen bonding: A paradigm in supramolecular chemistry. *Chemistry-a European Journal* 7: 2511–2519.
- Metrangolo P, Neukirch H, Pilati T, Resnati G (2005) Halogen bonding based recognition processes: A world parallel to hydrogen bonding. *Accounts of Chemical Research* 38: 386–395.
- Rissanen K (2008) Halogen bonded supramolecular complexes and networks. *CrystEngComm* 10: 1107–1113.
- Aakeroy CB, Champness NR, Janiak C (2010) Recent advances in crystal engineering. *CrystEngComm* 12: 22–43.
- Mooibroek TJ, Gamez P (2013) Halogen  $\cdots$  phenyl supramolecular interactions in the solid state: hydrogen versus halogen bonding and directionality. *CrystEngComm* 15: 1802–1805.
- Mooibroek TJ, Gamez P (2013) Halogen bonding versus hydrogen bonding: what does the Cambridge Database reveal? *Crystengcomm* 15: 4565–4570.
- Auffinger P, Hays FA, Westhof E, Ho PS (2004) Halogen bonds in biological molecules. *Proceedings of the National Academy of Sciences of the United States of America* 101: 16789–16794.
- Voth AR, Ho PS (2007) The role of halogen bonding in inhibitor recognition and binding by protein kinases. *Current Topics in Medicinal Chemistry* 7: 1336–1348.
- Rendine S, Pieraccini S, Forni A, Sironi M (2011) Halogen bonding in ligand-receptor systems in the framework of classical force fields. *Physical Chemistry Chemical Physics* 13: 19508–19516.
- Wang W, Okada Y, Shi HB, Wang YQ, Okuyama T (2005) Structures and aldose reductase inhibitory effects of bromophenols from the red alga *Symphocladia latiuscula*. *Journal of Natural Products* 68: 620–622.
- Hernandes MZ, Cavalcanti SMT, Moreira DRM, de Azevedo WF Jr, Lima Leite AC (2010) Halogen Atoms in the Modern Medicinal Chemistry: Hints for the Drug Design. *Current Drug Targets* 11: 303–314.
- Pauletti PM, Cintra LS, Braguine CG, da Silva Filho AA, Andrade e Silva ML, et al. (2010) Halogenated Indole Alkaloids from Marine Invertebrates. *Marine Drugs* 8: 1526–1549.
- Parisini E, Metrangolo P, Pilati T, Resnati G, Terraneo G (2011) Halogen bonding in halocarbon-protein complexes: a structural survey. *Chemical Society Reviews* 40: 2267–2278.



25. Voth AR, Hays FA, Ho PS (2007) Directing macromolecular conformation through halogen bonds. *Proceedings of the National Academy of Sciences of the United States of America* 104: 6188–6193.
26. Voth AR, Khuu P, Oishi K, Ho PS (2009) Halogen bonds as orthogonal molecular interactions to hydrogen bonds. *Nature Chemistry* 1: 74–79.
27. Wilcken R, Zimmermann MO, Lange A, Joerger AC, Boeckler FM (2013) Principles and Applications of Halogen Bonding in Medicinal Chemistry and Chemical Biology. *Journal of Medicinal Chemistry* 56: 1363–1388.
28. Poznanski J, Shugar D (2013) Halogen bonding at the ATP binding site of protein kinases: Preferred geometry and topology of ligand binding. *Biochimica et Biophysica Acta* 1834: 1381–1386.
29. Sarwar MG, Dragisic B, Salsberg LJ, Gouliaras C, Taylor MS (2010) Thermodynamics of Halogen Bonding in Solution: Substituent, Structural, and Solvent Effects. *Journal of the American Chemical Society* 132: 1646–1653.
30. Politzer P, Lane P, Concha MC, Ma Y, Murray JS (2007) An overview of halogen bonding. *Journal of Molecular Modeling* 13: 305–311.
31. Hauchecorne D, van der Veken BJ, Moiana A, Herrebout WA (2010) The C-Cl...N halogen bond, the weaker relative of the C-I and C-Br...N halogen bonds, finally characterized in solution. *Chemical Physics* 374: 30–36.
32. Metrangolo P, Murray JS, Pilati T, Politzer P, Resnati G, et al. (2011) Fluorine-Centered Halogen Bonding: A Factor in Recognition Phenomena and Reactivity. *Crystal Growth & Design* 11: 4238–4246.
33. Politzer P, Murray JS, Clark T (2010) Halogen bonding: an electrostatically-driven highly directional noncovalent interaction. *Physical Chemistry Chemical Physics* 12: 7748–7757.
34. An X, Zhuo H, Wang Y, Li Q (2013) Competition between hydrogen bonds and halogen bonds in complexes of formamidine and hypohalous acids. *Journal of Molecular Modeling* 19: 4529–4535.
35. Riley KE, Rezac J, Hobza P (2013) Competition between halogen, dihalogen and hydrogen bonds in bromo- and iodo-methanol dimers. *Journal of Molecular Modeling* 19: 2879–2883.
36. Li Q, Xu X, Liu T, Jing B, Li W, et al. (2010) Competition between hydrogen bond and halogen bond in complexes of formaldehyde with hypohalous acids. *Physical Chemistry Chemical Physics* 12: 6837–6843.
37. Liu X, Cheng J, Li Q, Li W (2013) Competition of hydrogen, halogen, and pnictogen bonds in the complexes of HArF with XH<sub>2</sub>P (X = F, Cl, and Br). *Spectrochimica Acta Part a-Molecular and Biomolecular Spectroscopy* 101: 172–177.
38. Raatikainen K, Cametti M, Rissanen K (2010) The subtle balance of weak supramolecular interactions: The hierarchy of halogen and hydrogen bonds in haloanilinium and halopyridinium salts. *Beilstein Journal of Organic Chemistry* 6.
39. Aakeroy CB, Panikattu S, Chopade PD, Desper J (2013) Competing hydrogen-bond and halogen-bond donors in crystal engineering. *Crystengcomm* 15: 3125–3136.
40. Carter M, Ho PS (2011) Assaying the Energies of Biological Halogen Bonds. *Crystal Growth & Design* 11: 5087–5095.
41. Hardegger LA, Kuhn B, Spinnler B, Anselm L, Ecabert R, et al. (2011) Systematic Investigation of Halogen Bonding in Protein-Ligand Interactions. *Angewandte Chemie-International Edition* 50: 314–318.
42. Xu Z, Liu Z, Chen T, Chen T, Wang Z, et al. (2011) Utilization of Halogen Bond in Lead Optimization: A Case Study of Rational Design of Potent Phosphodiesterase Type 5 (PDE5) Inhibitors. *Journal of Medicinal Chemistry* 54: 5607–5611.
43. Wasik R, Winska P, Poznanski J, Shugar D (2012) Isomeric Mono-, Di-, and Tri-Bromobenzo-1H-Triazoles as Inhibitors of Human Protein Kinase CK2 alpha. *Plos One* 7: e48898.
44. Seela F, Peng XH, Li H (2005) Base-pairing, tautomerism, and mismatch discrimination of 7-halogenated 7-deaza-2'-deoxylsoguanosine: Oligonucleotide duplexes with parallel and antiparallel chain orientation. *Journal of the American Chemical Society* 127: 7739–7751.
45. Wasik R, Lebska M, Felczak K, Poznanski J, Shugar D (2010) Relative Role of Halogen Bonds and Hydrophobic Interactions in Inhibition of Human Protein Kinase CK2 alpha by Tetrabromobenzotriazole and Some C(5)-Substituted Analogues. *Journal of Physical Chemistry B* 114: 10601–10611.
46. Wasik R, Winska P, Poznanski J, Shugar D (2012) Synthesis and Physico-Chemical Properties in Aqueous Medium of All Possible Isomeric Bromo Analogues of Benzo-1H-Triazole, Potential Inhibitors of Protein Kinases. *Journal of Physical Chemistry B* 116: 7259–7268.
47. Kuopio R, Kivinen A, Murto J (1976) Hexamethylphosphoramide as Proton Acceptor. Part 1. A Near-infrared Study of Its Heteroassociation with Ordinary and Halogenated Alcohols. *Acta Chemica Scandinavica A* 30: 1–7.
48. Guerra CF, Wijst T, Bickelhaupt FM (2005) Substituent effects on hydrogen bonding in Watson-Crick base pairs. A theoretical study. *Structural Chemistry* 16: 211–221.
49. Heshmati E, Abdolmaleki P, Mozdarani H, Sarvestani AS (2009) Effects of halogen substitution on Watson-Crick base pairing: A possible mechanism for radiosensitivity. *Bioorganic & Medicinal Chemistry Letters* 19: 5256–5260.
50. Lozinski T, Wierzchowski KL (2001) Mg<sup>2+</sup> ions do not induce expansion of the melted DNA region in the open complex formed by *Escherichia coli* RNA polymerase at a cognate synthetic Pa promoter. A quantitative KMnO<sub>4</sub> footprinting study. *Acta Biochimica Polonica* 48: 495–510.
51. Simpson RT, Seale RL (1974) Characterization of chromatin extensively substituted with 5-bromodeoxyuridine. *Biochemistry* 13: 4609–4616.
52. Cullen BR, Bick MD (1976) Thermal denaturation of DNA from bromodeoxyuridine substituted cells. *Nucleic Acids Res* 3: 49–62.
53. Inman R, Baldwin R (1962) Formation of hybrid molecules from two alternating DNA copolymers. *J Mol Biol* 5: 185–200.
54. Inman R, Baldwin R (1962) Helix-random coil transitions in synthetic DNAs of alternating sequence. *J Mol Biol* 5: 172–184.
55. Inman RB, Baldwin RL (1964) Helix-random coil transitions in DNA homopolymer pairs. *J Mol Biol* 8: 452–469.
56. Kuhn B, Mohr P, Stahl M (2010) Intramolecular Hydrogen Bonding in Medicinal Chemistry. *Journal of Medicinal Chemistry* 53: 2601–2611.
57. Vulpetti A, Dalvit C (2012) Fluorine local environment: from screening to drug design. *Drug Discovery Today* 17: 890–897.
58. Scholfield MR, Vander Zanden CM, Carter M, Ho PS (2013) Halogen bonding (X-bonding): A biological perspective. *Protein Science* 22: 139–152.
59. Lu Y, Liu Y, Xu Z, Li H, Liu H, et al. (2012) Halogen bonding for rational drug design and new drug discovery. *Expert Opinion on Drug Discovery* 7: 375–383.
60. Zhou P, Tian F, Zou J, Shang Z (2010) Rediscovery of Halogen Bonds in Protein-Ligand Complexes. *Mini-Reviews in Medicinal Chemistry* 10: 309–314.
61. Baldrighi M, Cavallo G, Chierotti MR, Gobetto R, Metrangolo P, et al. (2013) Halogen Bonding and Pharmaceutical Cocrystals: The Case of a Widely Used Preservative. *Molecular Pharmaceutics* 10: 1760–1772.
62. Jeffrey GA, Saenger W (1994) *Hydrogen Bonding in Biological Structures*: Springer.
63. Protein Data Bank; Available: <http://www.rcsb.org>; Downloaded October 2012.
64. Krieger E, Joo K, Lee J, Lee J, Raman S, et al. (2009) Improving physical realism, stereochemistry, and side-chain accuracy in homology modeling: Four approaches that performed well in CASP8. *Proteins-Structure Function and Bioinformatics* 77: 114–122.
65. Anderson TW, Darling DA (1952) Asymptotic theory of certain goodness of fit criteria based on stochastic processes. *Annals of Mathematical Statistics* 23: 193–212.
66. Mann HB, Whitney DR (1947) On a test of whether one of two random variables is stochastically larger than the other. *Annals of Mathematical Statistics* 18: 50–60.
67. Kruskal WH, Wallis WA (1952) Use of ranks in one-criterion variance analysis. *Journal of the American Statistical Association* 47: 583–621.
68. Freidlin B, Gastwirth JL (2000) Should the median test be retired from general use? *American Statistician* 54: 161–164.
69. (2011) STATISTICA (data analysis software system) version 10. StatSoft, Inc.
